# Supplementary material
Source: Research Square preprint supplement (doi:10.21203/rs.3.rs-9779007/v1)
Supplement: Supplementary file 1 [file b7476710c37f7f0383287d4f.docx]

**Supplementary Information**: The online version contains supplementary material available at
