# Supplementary material
Source: Research Square preprint supplement (doi:10.21203/rs.3.rs-9779007/v1)
Supplement: Supplementary file 2 [file fec7bba4e0d66ea186381d8d.docx]

**Metagenomic Insights into Lignocellulose-Degrading Microbiota in High-Temperature (75°C) Chicken Manure and Straw Compost via Nanopore Sequencing**

Tigran Soghomonyan1, Lev Khoyetsyan1, Artur Hambardzumyan[[1]](#footnote-1)*1, Oleg Reva2, Marina Paronyan1, Karine Dyukova1, Marieta Izmailyan1, Anichka Hovsepyan1, Anna Mkhitaryan1

1SPC “Armbiotechnology” NAS RA, Yerevan 0056, Gyurjyan 14, Republic of Armenia

2University of Pretoria, BGM, Centre for Bioinformatics and Computational Biology, Lynnwood Road, Hillcrest, Pretoria 0002, South Africa


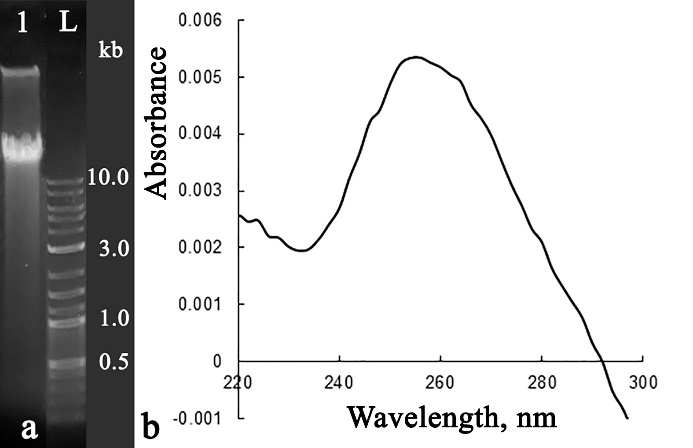


**Fig. S1.** Molecular and spectral characteristics of DNA prepared from thermophilic compost biomass. (a) – 0.8% agarose gel electrophoresis in TAE buffer (1 – metagenomic DNA sample; L – TriDye™ 1 kb Plus DNA Ladder, NEB); (b) – UV spectrum of a 301-fold diluted metagenomic DNA sample.


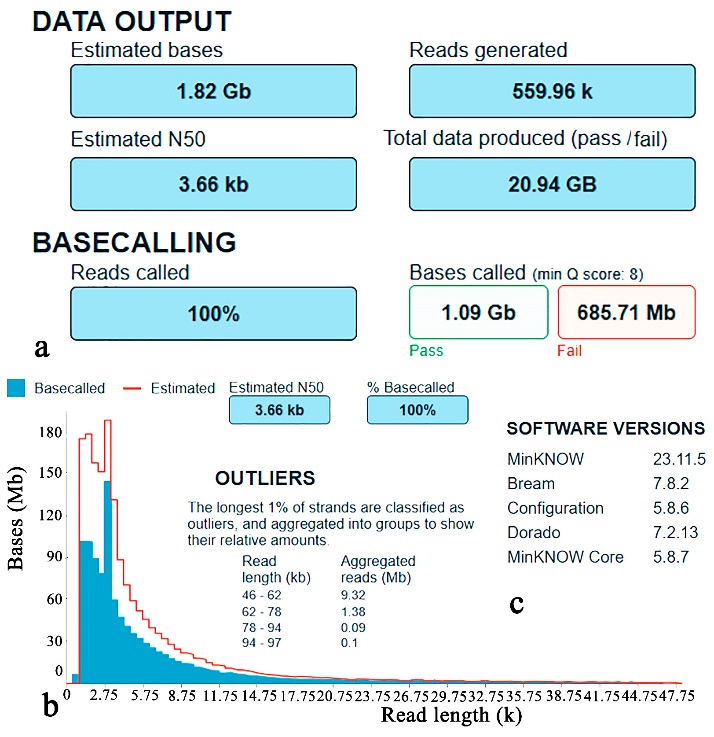


**Fig. S2.** Main parameters of the MinKNOW Run Report: (a) – Data output and basecalling parameters; (b) – Read length histogram with outliers; (c) – Software versions.

**Table S1.**

Distribution of quality reads of the obtained metagenome at the phylum level

| **fastq_pass_M2** | **total** | **superkingdom** | **kingdom** | **phylum** |
| --- | --- | --- | --- | --- |
| 169861 | 169861 | Bacteria | Thermotogati | Deinococcota |
| 83893 | 83893 | Unclassified | Unknown | Unknown |
| 44502 | 44502 | Bacteria | Pseudomonadati | Pseudomonadota |
| 11414 | 11414 | Bacteria | Bacillati | Bacillota |
| 2705 | 2705 | Bacteria | Pseudomonadati | Rhodothermota |
| 2388 | 2388 | Bacteria | Bacillati | Actinomycetota |
| 1264 | 1264 | Eukaryota | Metazoa | Chordata |
| 622 | 622 | Bacteria | Thermotogati | Thermotogota |
| 357 | 357 | Bacteria | Pseudomonadati | Bacteroidota |
| 203 | 203 | Bacteria | Pseudomonadati | Thermomicrobiota |
| 117 | 117 | Viruses | Heunggongvirae | Uroviricota |
| 49 | 49 | Bacteria | Pseudomonadati | Thermodesulfobacteriota |
| 18 | 18 | Bacteria | Pseudomonadati | Myxococcota |


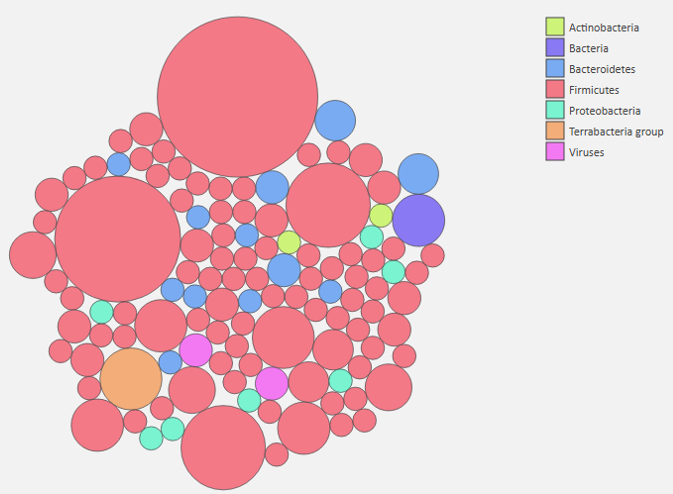


**Fig. S3.** Taxonomic abundance of bin.001 derived from the Kaiju web server.


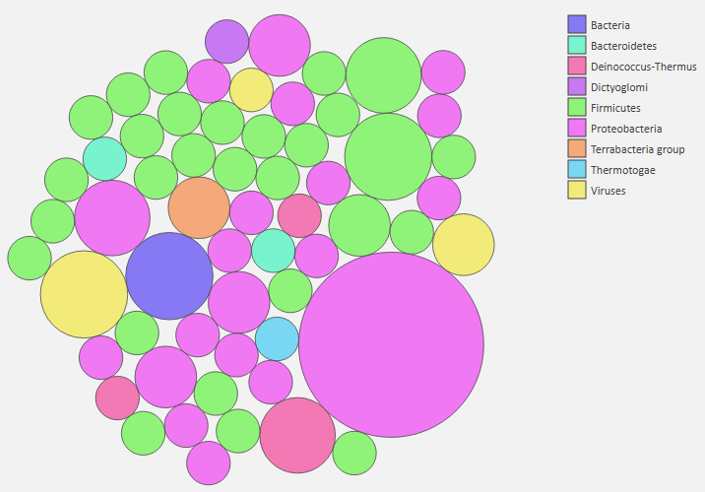


**Fig. S4.** Taxonomic abundance of bin.002 derived from the Kaiju web server.


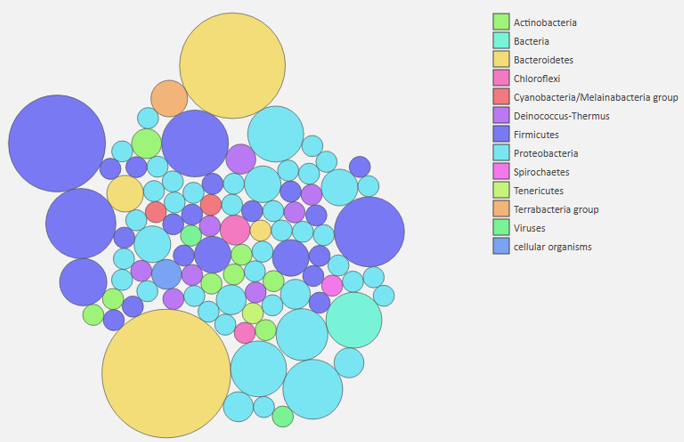


**Fig. S5.** Taxonomic abundance of bin.003 derived from the Kaiju web server.


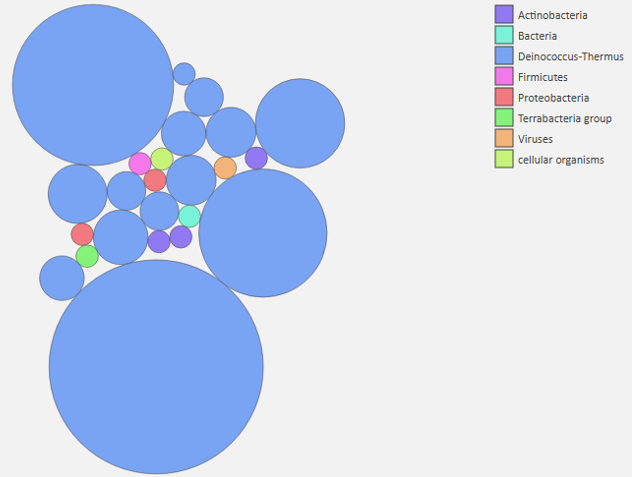


**Fig. S6.** Taxonomic abundance of bin.004 derived from the Kaiju web server.


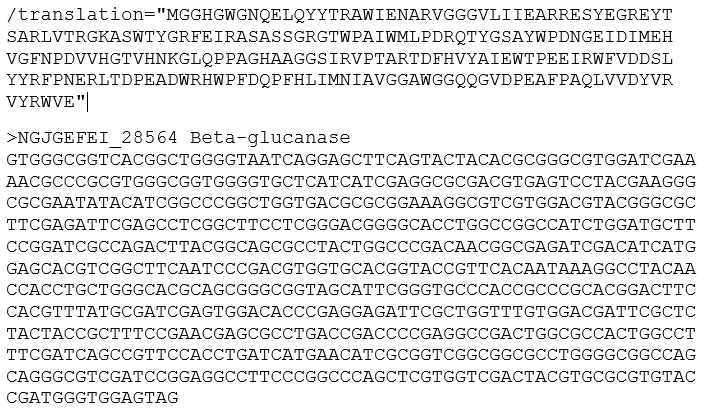


**Fig. S7.** Amino acid and nucleotide sequences of β-glucanase_28564.


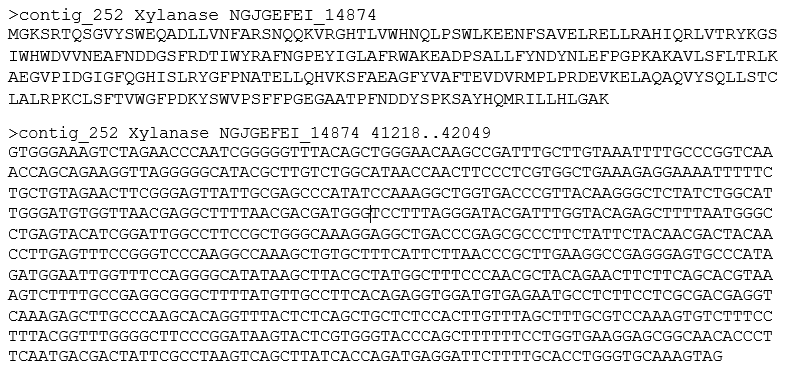


**Fig. S8.** Amino acid and nucleotide sequences of xylanase_14874.


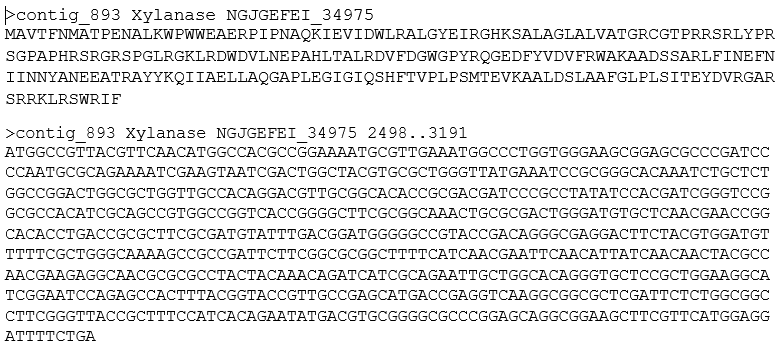


**Fig. S9.** Amino acid and nucleotide sequences of xylanase_34975.


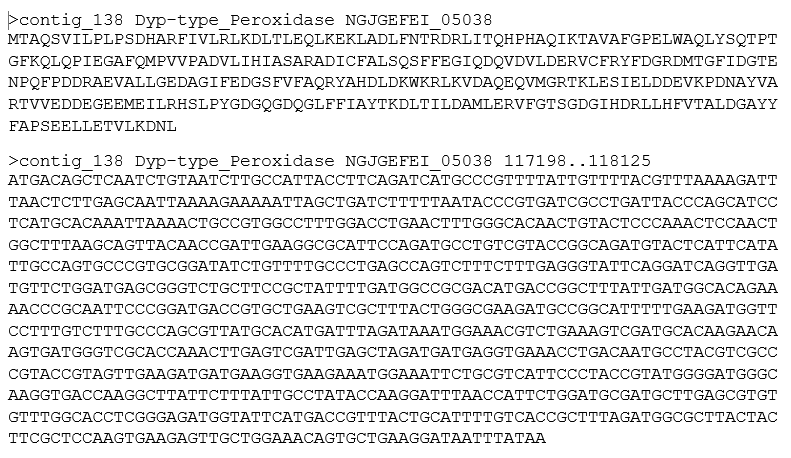


**Fig. S10.** Amino acid and nucleotide sequences of peroxidase_05038.


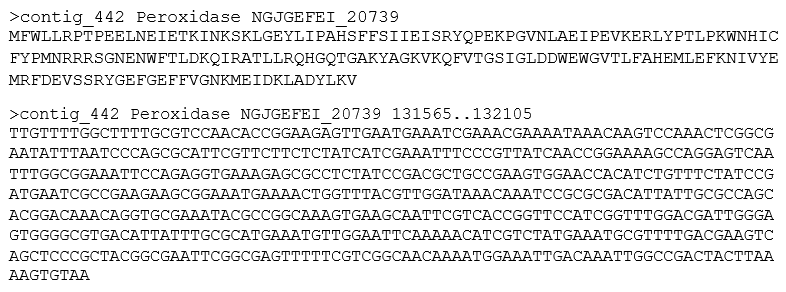


**Fig. S11.** Amino acid and nucleotide sequences of peroxidase_20739.


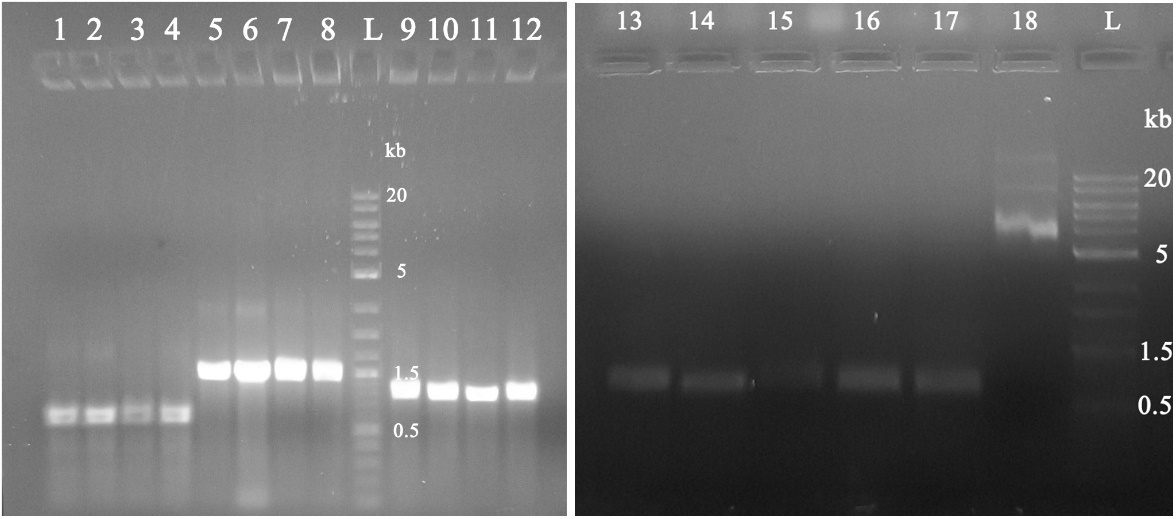


**Fig. S12.** Colony PCR results for *B. subtilis* RIK1285 strains harboring xylanase and peroxidase genes on the pBE‑S vector. L — NEB TriDye™ 1 kb Plus DNA ladder. Lane identities: 1–4, Xyl_M2_34975; 5–8, Pox_M2_05038; 9–12, Xyl_M2_14874; 13–17, Pox_M2_20739; 18, pBE‑S vector.


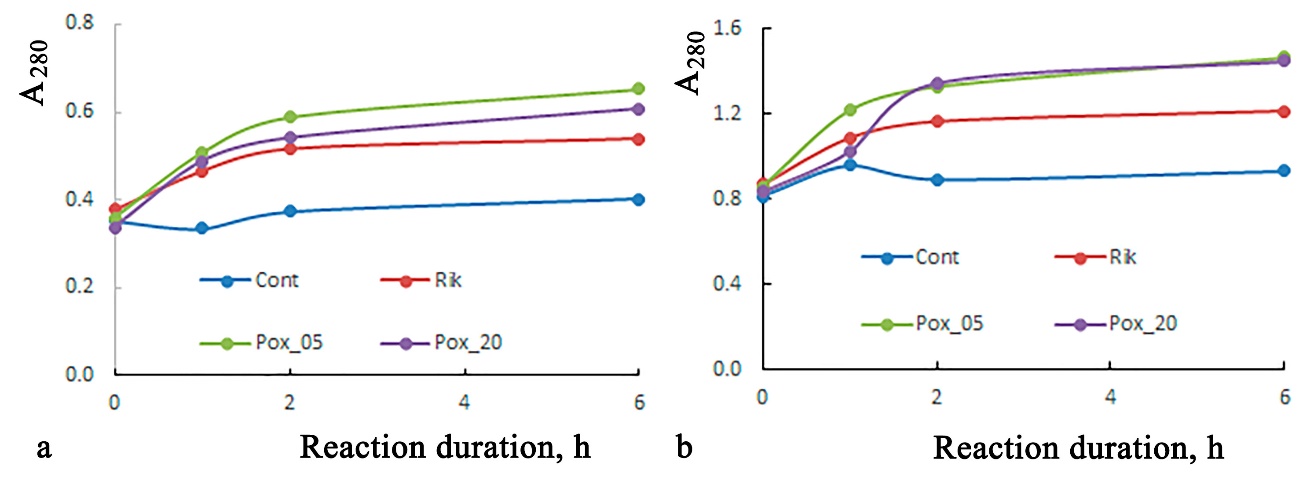


**Fig. S13.** Estimation of lignin‑degrading activity of metagenome‑derived peroxidases NGJGEFEI_05038 (05) and NGJGEFEI_20739 (20). Reaction conditions as described in Materials and Methods. (a) Reaction at pH 4.5; samples diluted 6‑fold prior to measuring absorbance at 280 nm (A280). (b) Reaction at pH 7.2; samples diluted 60‑fold prior to measuring absorbance at 280 nm (A280).

1. * Corresponding author [↑](#footnote-ref-1)
